# Supplementary material for: An evolutionary perspective on kin care directed up the generations
Source: PubMed Central journal article supplement (PMC8266810; doi:10.1038/s41598-021-93652-4), 2021-07-08
Supplement: 41598_2021_93652_MOESM1_ESM.pdf [file 41598_2021_93652_MOESM1_ESM.pdf]

*Supplementary information for*

# An evolutionary perspective on kin care directed up the generations

**Megan Arnot & Ruth Mace**

Table S1. Participant characteristics.

|                                                | All<br>n (%) / median<br>(IQR) | Still<br>menstruating<br>n (%) / median<br>(IQR) | No longer<br>menstruating<br>n (%) / median<br>(IQR) |
|------------------------------------------------|--------------------------------|--------------------------------------------------|------------------------------------------------------|
| n                                              | 934                            | 98                                               | 836                                                  |
| Hours spent caring for grandchildren per month | 18 (0, 48)                     | 13.5 (0, 32)                                     | 20 (0, 48)                                           |
| Hours spent helping parents per week           | 2 (0, 5)                       | 1 (0, 6)                                         | 2 (0, 5)                                             |
| Fecundity status                               |                                |                                                  |                                                      |
| Still menstruating                             | 98 (10.49)                     | 98 (100.00)                                      | 0 (0.00)                                             |
| No longer menstruating                         | 836 (89.51)                    | 0 (0.00)                                         | 836 (100.00)                                         |
| Age left education                             | 16 (16, 17)                    | 16 (16, 18)                                      | 16 (16, 17)                                          |
| Employment status                              |                                |                                                  |                                                      |
| Employed                                       | 717 (76.77)                    | 80 (81.63)                                       | 637 (76.20)                                          |
| Unemployed                                     | 68 (7.28)                      | 6 (6.12)                                         | 62 (7.42)                                            |
| Other                                          | 149 (15.95)                    | 12 (12.24)                                       | 137 (16.39)                                          |
| Self-perceived health                          |                                |                                                  |                                                      |
| Excellent                                      | 101 (10.81)                    | 15 (15.31)                                       | 86 (10.29)                                           |
| Very good/good                                 | 615 (65.85)                    | 65 (66.33)                                       | 550 (65.79)                                          |
| Fair                                           | 144 (15.42)                    | 11 (11.22)                                       | 133 (15.91)                                          |

|                           | All<br>n (%)/median<br>(IQR) | Still<br>menstruating<br>n (%)/median<br>(IQR) | No longer<br>menstruating<br>n (%)/median<br>(IQR) |
|---------------------------|------------------------------|------------------------------------------------|----------------------------------------------------|
| Poor/very poor            | 74 (7.92)                    | 7 (7.14)                                       | 67 (8.01)                                          |
| Father's age at birth     | 27 (24, 30)                  | 27 (24, 31.75)                                 | 27 (24, 30)                                        |
| Mother's age at birth     | 24 (21, 27)                  | 24.00 (22, 28)                                 | 24.00 (21, 27)                                     |
| Parent mortality          |                              |                                                |                                                    |
| Both parents alive        | 315 (33.73)                  | 40 (40.82)                                     | 275 (32.89)                                        |
| Mother dead, father alive | 153 (16.38)                  | 14 (14.29)                                     | 139 (16.63)                                        |
| Mother alive, father dead | 466 (49.89)                  | 44 (44.90)                                     | 422 (50.48)                                        |
| Number of grandchildren   | 2.00 (1, 4)                  | 2 (1, 4)                                       | 2 (1, 4)                                           |

Table S2. Comparison of models with Vuong's statistic. NB = negative binomial regression, ZINB = zero-inflated negative binomial regression.

| Outcome         | First model | Second model | Vuong z-statistic | p value | Better model |
|-----------------|-------------|--------------|-------------------|---------|--------------|
| Parent help     | NB          | ZINB         | -3.623649         | <0.001  | ZINB         |
| Grandchild care | NB          | ZINB         | -12.897627        | <0.001  | ZINB         |

Table S3. Results from all models using zero-inflated negative binomial regression, reporting incidence rate ratios for the count part of the model and odds ratios for the zero-inflated part, and the 95% confidence intervals.

|  | Outcome =<br>Hours spent helping parents<br>per week |                                     | Outcome =<br>Hours spent caring for<br>grandchildren per month |                                     |
|--|------------------------------------------------------|-------------------------------------|----------------------------------------------------------------|-------------------------------------|
|  | Covariates                                           | Fecundity<br>status +<br>Covariates | Covariates                                                     | Fecundity<br>status +<br>Covariates |

**Count model:**

|                                                 | Outcome =<br>Hours spent helping parents<br>per week |                                     | Outcome =<br>Hours spent caring for<br>grandchildren per month |                                     |
|-------------------------------------------------|------------------------------------------------------|-------------------------------------|----------------------------------------------------------------|-------------------------------------|
|                                                 | Covariates                                           | Fecundity<br>status +<br>Covariates | Covariates                                                     | Fecundity<br>status +<br>Covariates |
| Fecundity status (ref.:<br>Still menstruating)  |                                                      |                                     |                                                                |                                     |
| No longer<br>menstruating                       | -                                                    | 0.65<br>(0.43-0.97)                 | -                                                              | 1.55<br>(1.19-2.02)                 |
| Age left education                              | 0.91<br>(0.81-1.01)                                  | 0.89<br>(0.80-1.00)                 | 0.93<br>(0.87-1.00)                                            | 0.94<br>(0.88-1.01)                 |
| Employment status<br>(ref.: Unemployed)         |                                                      |                                     |                                                                |                                     |
| Employed                                        | 0.35<br>(0.19-0.63)                                  | 0.35<br>(0.19-0.62)                 | 0.83<br>(0.60-1.15)                                            | 0.84<br>(0.61-1.16)                 |
| Other                                           | 0.52<br>(0.28-0.98)                                  | 0.49<br>(0.26-0.91)                 | 1.40<br>(0.98-2.01)                                            | 1.37<br>(0.96-1.96)                 |
| Self-perceived health<br>(ref.: Poor/very poor) |                                                      |                                     |                                                                |                                     |
| Fair                                            | 1.04<br>(0.58-1.85)                                  | 1.11<br>(0.63-1.97)                 | 1.09<br>(0.78-1.53)                                            | 1.10<br>(0.79-1.54)                 |
| Very good/good                                  | 1.39<br>(0.80-2.43)                                  | 1.42<br>(0.82-2.46)                 | 1.00<br>(0.72-1.38)                                            | 1.00<br>(0.72-1.37)                 |
| Excellent                                       | 0.84<br>(0.43-1.64)                                  | 0.84<br>(0.44-1.63)                 | 1.03<br>(0.69-1.53)                                            | 1.03<br>(0.70-1.53)                 |
| Parent mortality (ref.:<br>Both parents alive)  |                                                      |                                     |                                                                |                                     |
| Mother alive, father<br>dead                    | 1.17<br>(0.90-1.51)                                  | 1.21<br>(0.94-1.57)                 | 1.04<br>(0.86-1.26)                                            | 1.04<br>(0.86-1.25)                 |
| Mother dead, father<br>alive                    | 2.05<br>(1.39-3.03)                                  | 2.14<br>(1.45-3.15)                 | 0.90<br>(0.70-1.14)                                            | 0.88<br>(0.69-1.12)                 |

|                                                      | Outcome =<br>Hours spent helping parents<br>per week |                                     | Outcome =<br>Hours spent caring for<br>grandchildren per month |                                     |
|------------------------------------------------------|------------------------------------------------------|-------------------------------------|----------------------------------------------------------------|-------------------------------------|
|                                                      | Covariates                                           | Fecundity<br>status +<br>Covariates | Covariates                                                     | Fecundity<br>status +<br>Covariates |
| Mother's age at birth                                | 1.03<br>(0.99-1.06)                                  | 1.04<br>(1.00-1.08)                 | 1.00<br>(0.97-1.02)                                            | 0.99<br>(0.97-1.02)                 |
| Father's age at birth                                | 1.02<br>(0.99-1.05)                                  | 1.01<br>(0.98-1.04)                 | 1.00<br>(0.98-1.02)                                            | 1.00<br>(0.98-1.02)                 |
| Number of<br>grandchildren                           | 1.00<br>(0.96-1.05)                                  | 1.00<br>(0.95-1.05)                 | 0.99<br>(0.96-1.02)                                            | 0.99<br>(0.96-1.02)                 |
| Hours spent helping<br>parents per week              | -                                                    | -                                   | 1.00<br>(1.00-1.01)                                            | 1.00<br>(1.00-1.01)                 |
| Hours spent caring for<br>grandchildren per<br>month | 1.00<br>(1.00-1.00)                                  | 1.00<br>(1.00-1.00)                 | -                                                              | -                                   |
| <b><u>Zero-inflation model:</u></b>                  |                                                      |                                     |                                                                |                                     |
| Fecundity status (ref.:<br>Still menstruating)       |                                                      |                                     |                                                                |                                     |
| No longer<br>menstruating                            | -                                                    | 0.69<br>(0.30-1.60)                 | -                                                              | 0.82<br>(0.52-1.28)                 |
| Age left education                                   | 1.09<br>(0.84-1.42)                                  | 1.06<br>(0.81-1.39)                 | 1.11<br>(1.00-1.25)                                            | 1.11<br>(0.99-1.24)                 |
| Employment status<br>(ref.: Unemployed)              |                                                      |                                     |                                                                |                                     |
| Employed                                             | 0.34<br>(0.11-1.06)                                  | 0.34<br>(0.11-1.04)                 | 0.94<br>(0.49-1.78)                                            | 0.93<br>(0.49-1.77)                 |
| Other                                                | 0.50<br>(0.14-1.78)                                  | 0.48<br>(0.14-1.66)                 | 1.09<br>(0.55-2.17)                                            | 1.09<br>(0.55-2.17)                 |
| Self-perceived health<br>(ref.: Poor/very poor)      |                                                      |                                     |                                                                |                                     |

|                                                       | Outcome =<br>Hours spent helping parents<br>per week |                                     | Outcome =<br>Hours spent caring for<br>grandchildren per month |                                     |
|-------------------------------------------------------|------------------------------------------------------|-------------------------------------|----------------------------------------------------------------|-------------------------------------|
|                                                       | Covariates                                           | Fecundity<br>status +<br>Covariates | Covariates                                                     | Fecundity<br>status +<br>Covariates |
| Fair                                                  | 0.57<br>(0.14-2.24)                                  | 0.66<br>(0.18-2.39)                 | 0.61<br>(0.32-1.17)                                            | 0.61<br>(0.32-1.18)                 |
| Very good/good                                        | 0.81<br>(0.26-2.51)                                  | 0.82<br>(0.27-2.51)                 | 0.81<br>(0.44-1.50)                                            | 0.82<br>(0.45-1.50)                 |
| Excellent                                             | 0.69<br>(0.14-3.44)                                  | 0.69<br>(0.14-3.37)                 | 1.11<br>(0.55-2.25)                                            | 1.11<br>(0.55-2.24)                 |
| Parent mortality (ref.:<br>Both parents alive)        |                                                      |                                     |                                                                |                                     |
| Mother alive, father<br>dead                          | 0.45<br>(0.17-1.17)                                  | 0.47<br>(0.18-1.18)                 | 0.99<br>(0.71-1.37)                                            | 0.99<br>(0.71-1.38)                 |
| Mother dead, father<br>alive                          | 3.10<br>(1.52-6.33)                                  | 3.17<br>(1.56-6.47)                 | 1.05<br>(0.69-1.61)                                            | 1.06<br>(0.69-1.62)                 |
| Mother's age at birth                                 | 0.93<br>(0.83-1.03)                                  | 0.94<br>(0.84-1.04)                 | 1.03<br>(0.99-1.08)                                            | 1.03<br>(0.99-1.08)                 |
| Father's age at birth                                 | 0.97<br>(0.87-1.08)                                  | 0.96<br>(0.86-1.07)                 | 0.99<br>(0.95-1.03)                                            | 0.99<br>(0.95-1.03)                 |
| Number of<br>grandchildren                            | 0.97<br>(0.86-1.09)                                  | 0.96<br>(0.85-1.09)                 | 0.94<br>(0.88-1.00)                                            | 0.94<br>(0.89-1.00)                 |
| Hours spent helping<br>parents per week               | -                                                    | -                                   | 0.94<br>(0.91-0.97)                                            | 0.94<br>(0.91-0.97)                 |
| Hours spent caring for<br>grandchildren per<br>month) | 0.99<br>(0.97-1.00)                                  | 0.99<br>(0.97-1.00)                 | -                                                              | -                                   |
